# Supplementary material for: Effect of linear side-chain length on the photovoltaic performance of benzodithiophene-alt-dicarboxylic ester terthiophene polymers
Source: Royal Society of Chemistry journal article supplement (doi:10.1039/c9nj02484k), 2019-01-01
Supplement: c9nj02484k1.pdf [file c9nj02484k1.pdf]

**Effect of linear side-chain length on the photovoltaic  
performance of benzodithiophene-*alt*-dicarboxylic ester  
terthiophene polymers**

Kangqiao Ma,<sup>a,b</sup> Tao Zhang,<sup>b</sup> Pan Wan,<sup>b</sup> Bowei Xu,<sup>b</sup> Pengxin Zhou<sup>a\*</sup> and Cunbin An<sup>b\*</sup>

<sup>a</sup>College of Chemistry and Chemical Engineering, Northwest Normal University, Lanzhou 730070, China

<sup>b</sup>Beijing National Laboratory for Molecular Sciences, State Key Laboratory of Polymer Physics and Chemistry, Institute of Chemistry, Chinese Academy of Sciences, Beijing 100190, China

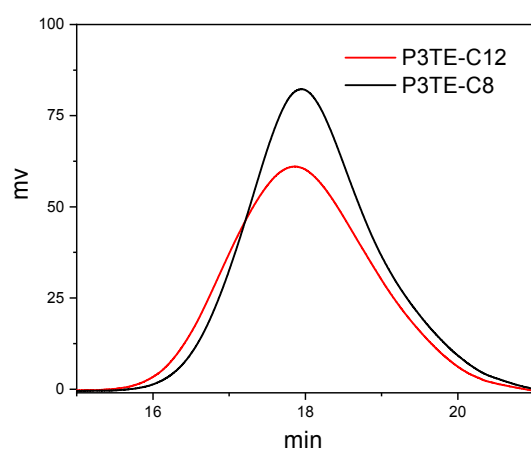

**Figure S1.** GPC curves for P3TE-C8 and P3TE-C12 measured at 145 °C.

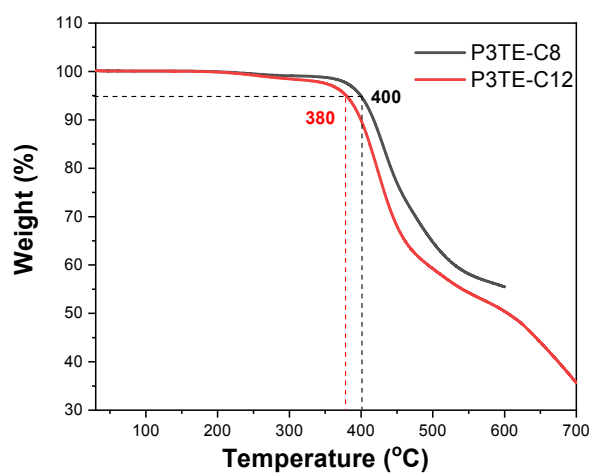

**Figure S2.** TGA curves for P3TE-C8 and P3TE-C12 measured under a nitrogen atmosphere at a heating rate of 10 °C/min.

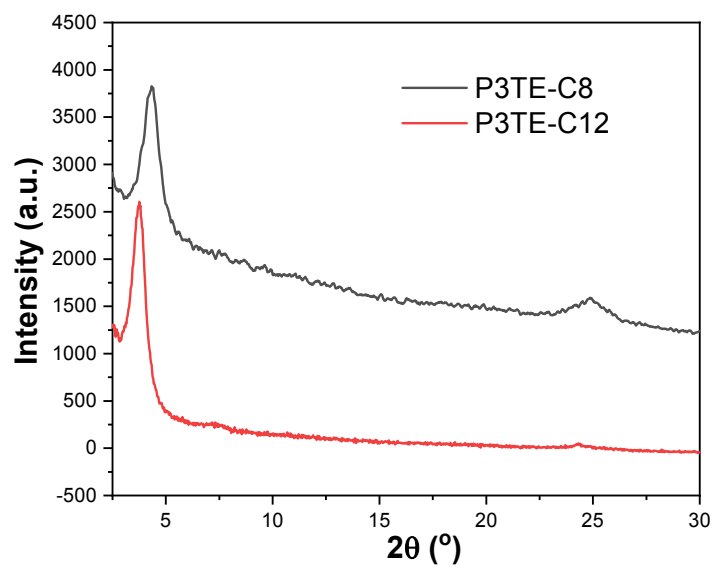

**Figure S3.** The XRD profiles of P3TE-C8 and P3TE-C12.

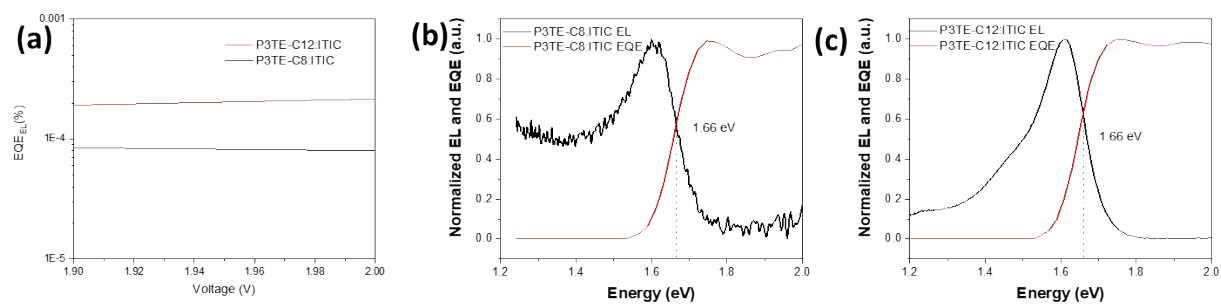

**Figure S4.** (a) The EQE<sub>EL</sub> of P3TE-C8:ITIC and P3TE-C12:ITIC The band gap of P3TE-C8:ITIC(b) and P3TE-C12:ITIC (c).

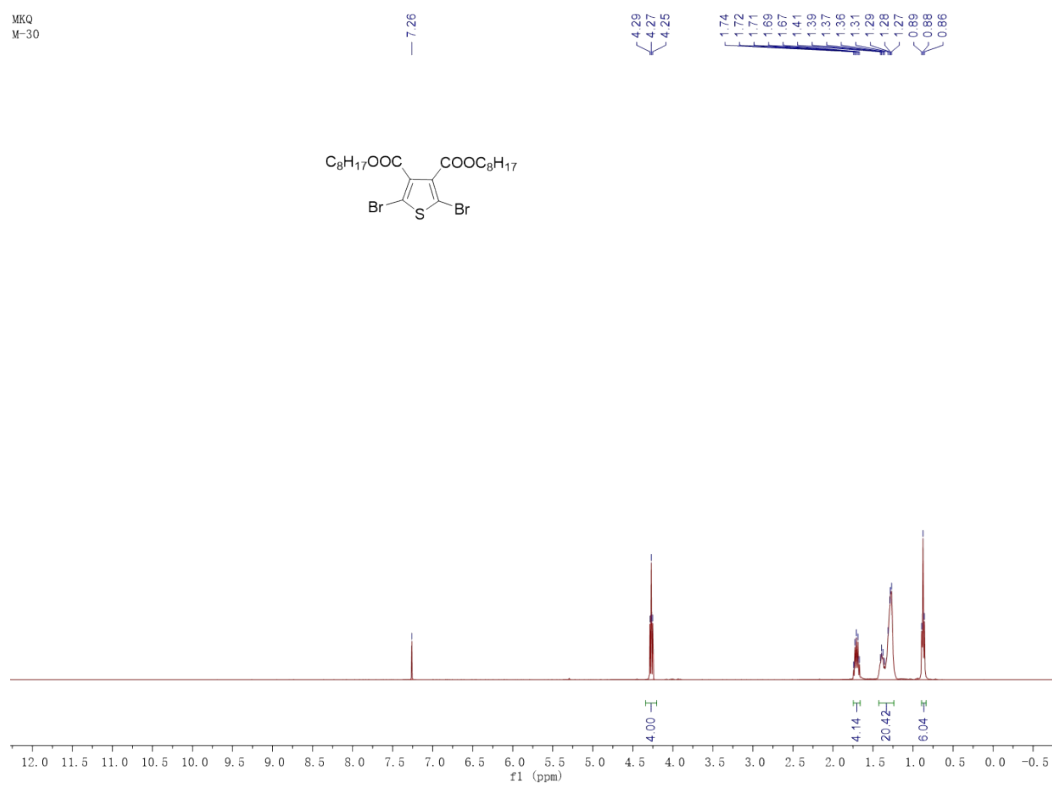

**Figure S5.** The  $^1\text{H}$ -NMR spectra of compound **2a** in  $\text{CDCl}_3$ .

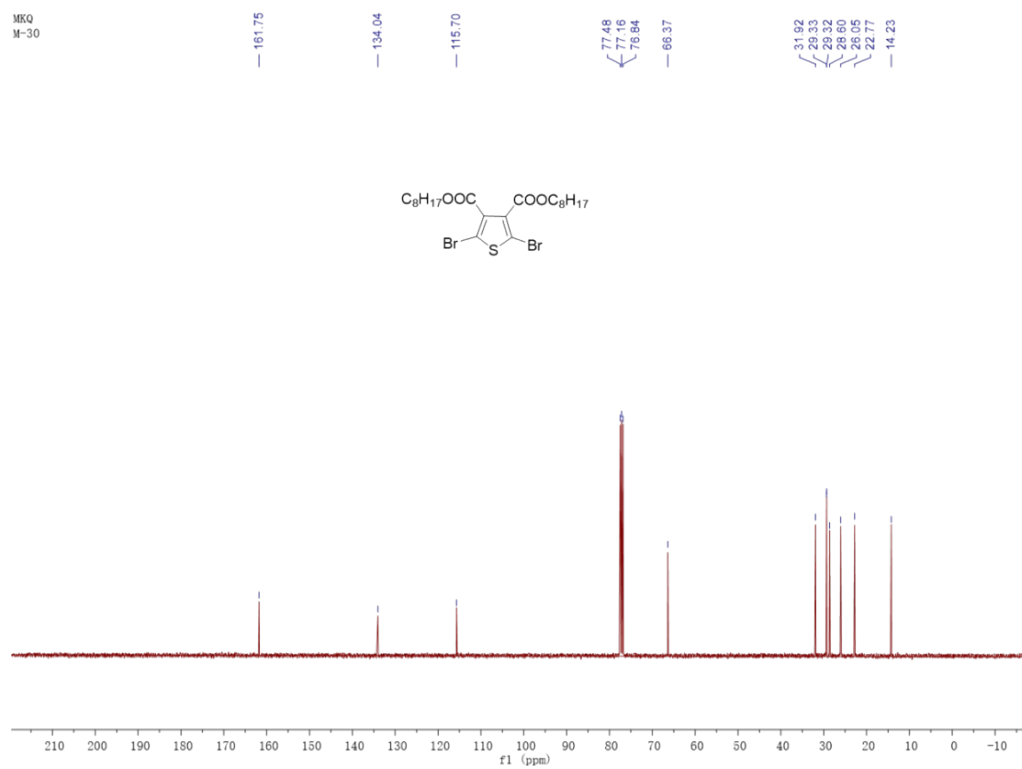

**Figure S6.** The  $^{13}\text{C}$ -NMR spectra of compound **2a** in  $\text{CDCl}_3$ .

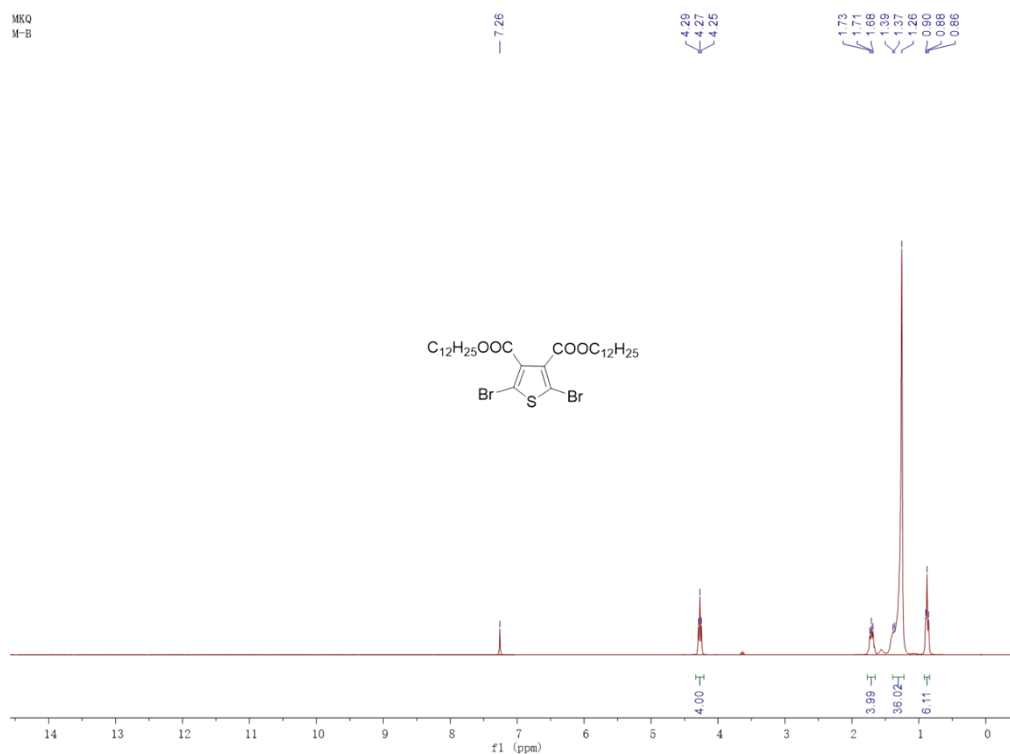

**Figure S7.** The <sup>1</sup>H-NMR spectra of compound **2b** in CDCl<sub>3</sub>.

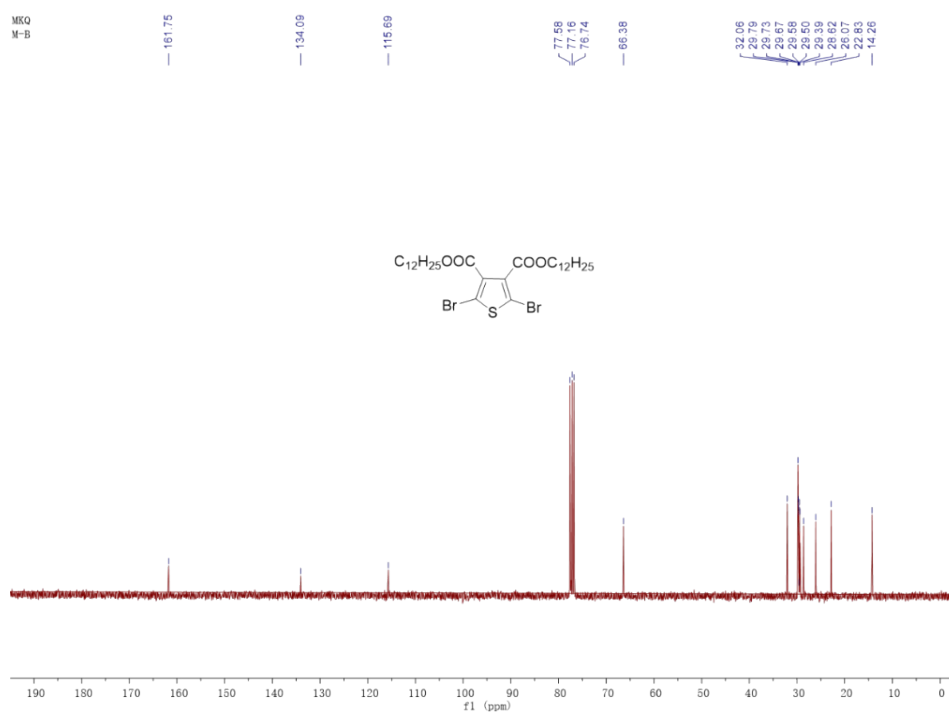

**Figure S8.** The <sup>13</sup>C-NMR spectra of compound **2b** in CDCl<sub>3</sub>.

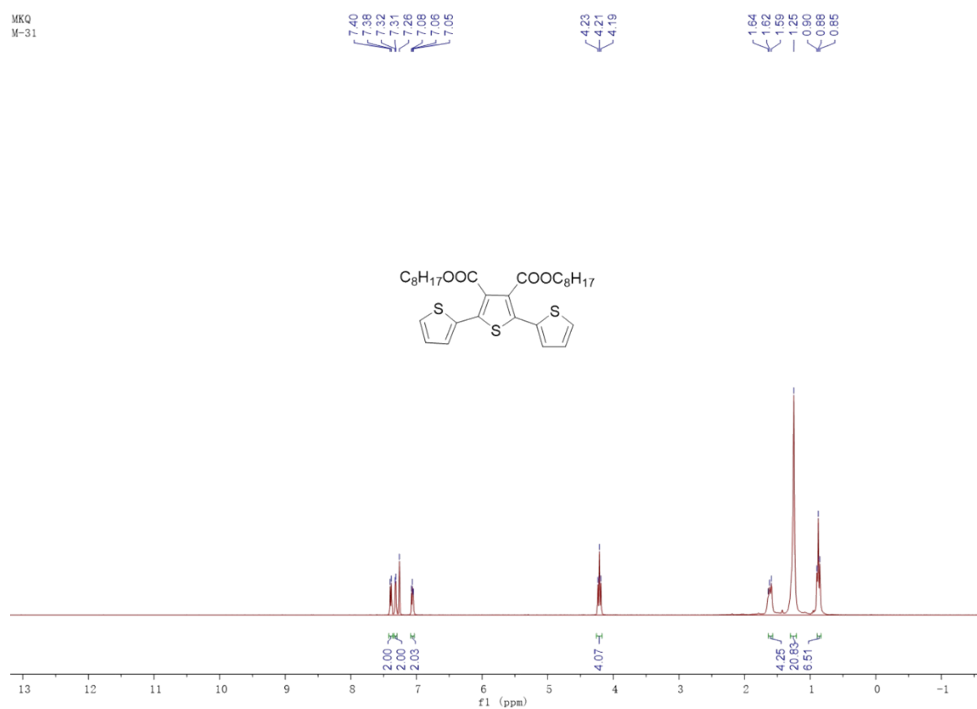

**Figure S9.** The <sup>1</sup>H-NMR spectra of compound **3a** in CDCl<sub>3</sub>.

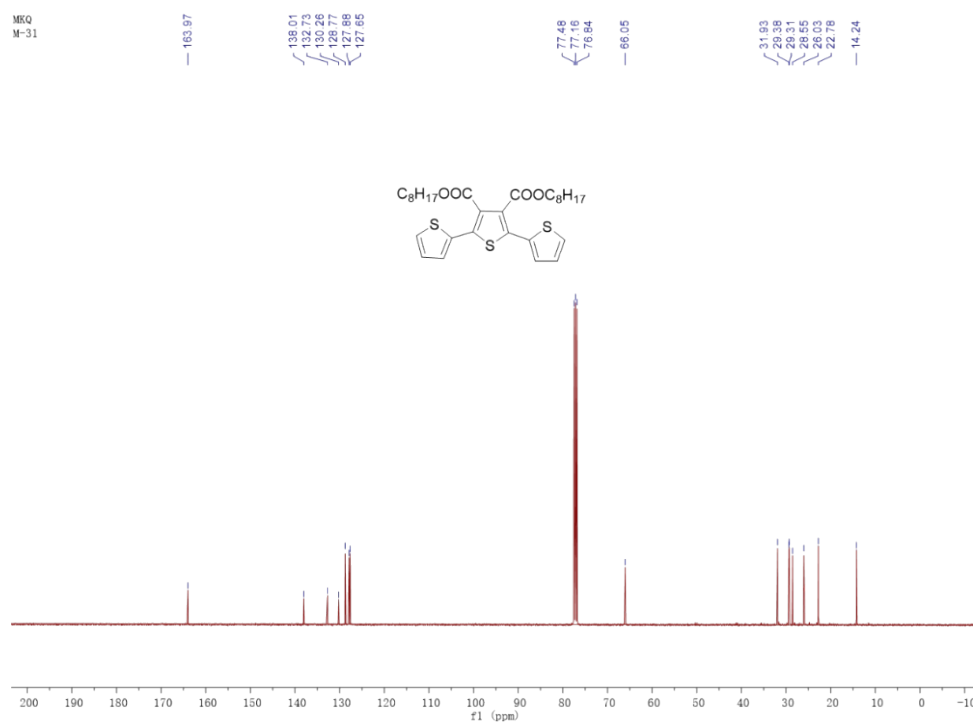

**Figure S10.** The <sup>13</sup>C-NMR spectra of compound **3a** in CDCl<sub>3</sub>.

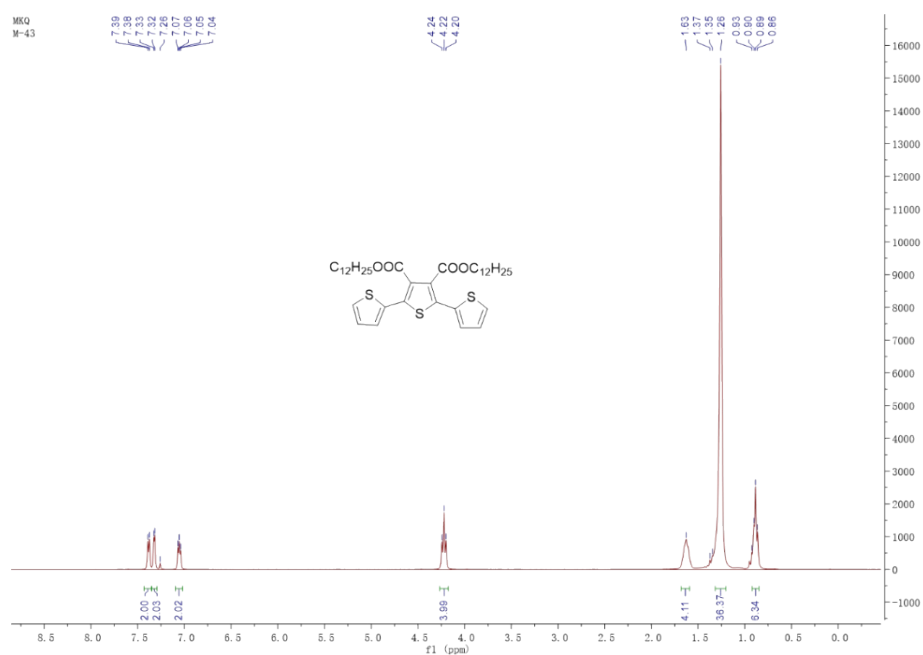

**Figure S11.** The <sup>1</sup>H-NMR spectra of compound **3b** in CDCl<sub>3</sub>.

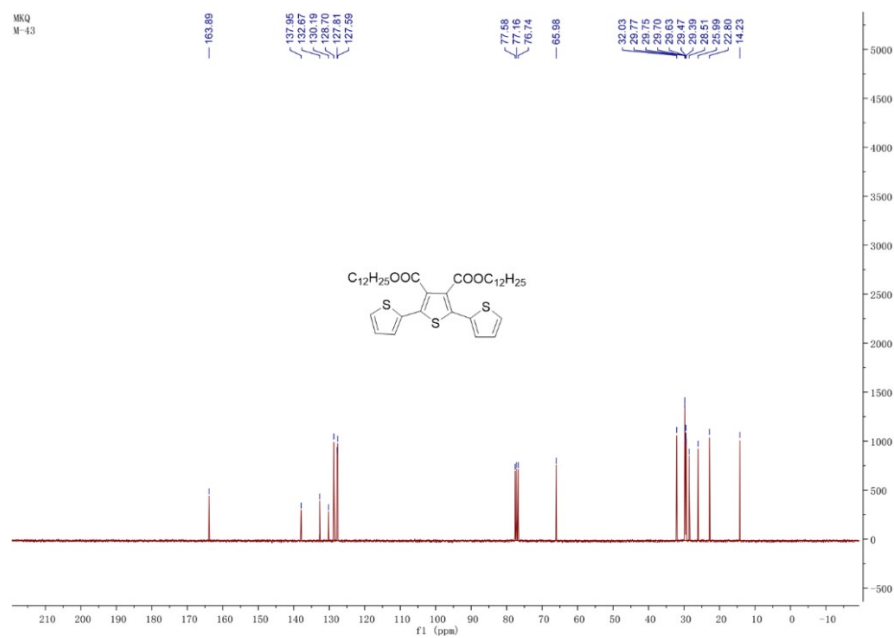

**Figure S12.** The <sup>13</sup>C-NMR spectra of compound **3b** in CDCl<sub>3</sub>.

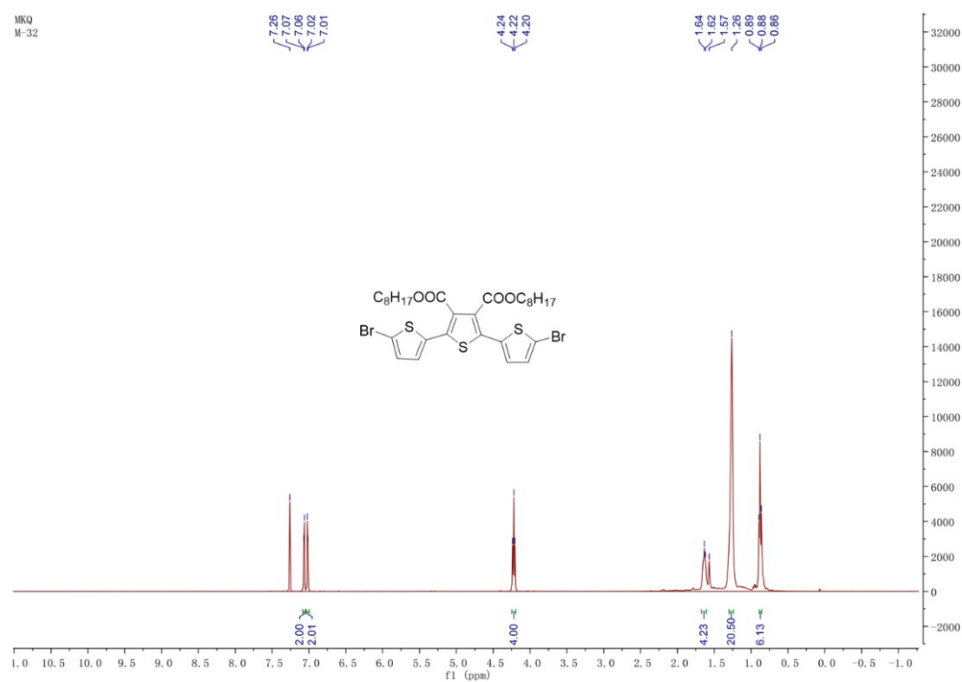

**Figure S13.** The <sup>1</sup>H-NMR spectra of compound **4a** in CDCl<sub>3</sub>.

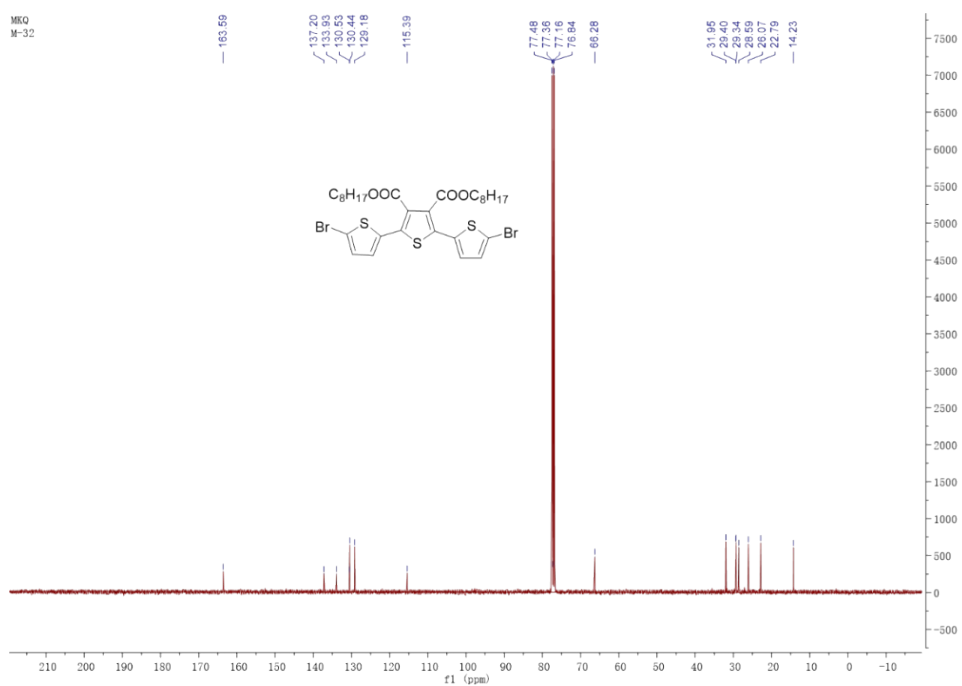

**Figure S14.** The <sup>13</sup>C-NMR spectra of compound **4a** in CDCl<sub>3</sub>.

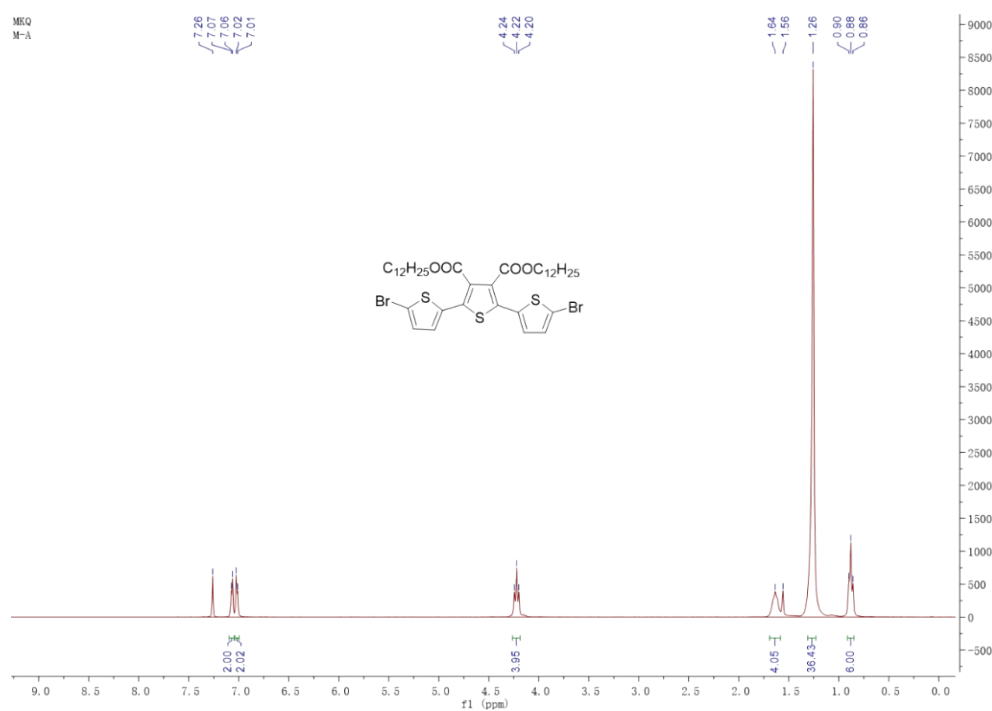

Figure S15. The <sup>1</sup>H-NMR spectra of compound **4b** in CDCl<sub>3</sub>.

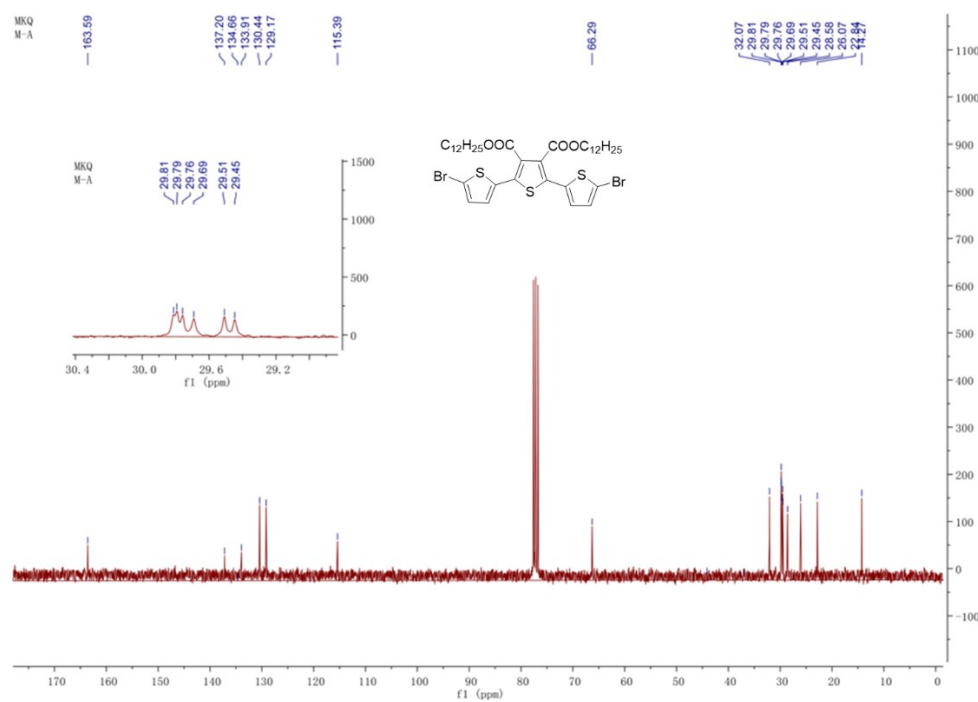

Figure S16. The <sup>13</sup>C-NMR spectra of compound **4b** in CDCl<sub>3</sub>.

**Table S1.** The best photovoltaic parameters of P3TE-C8:ITIC with different D:A weight ratios (w/w).

| D:A ratio | $V_{OC}$ (V) | $J_{SC}$ (mA cm <sup>-2</sup> ) | $FF$ (%) | $PCE$ (%) |
|-----------|--------------|---------------------------------|----------|-----------|
| 1.5:1     | 0.797        | 12.70                           | 45.29    | 4.58      |
| 1:1       | 0.777        | 13.52                           | 42.38    | 4.45      |
| 1:1.5     | 0.769        | 13.52                           | 40.66    | 4.23      |

P3TE-C8:ITIC was dissolved in chlorobenzene solution with a concentration of 10 mg mL<sup>-1</sup>. The solution was heated to 40 °C until total dissolution. The resulting solution was spin-coated onto PEDOT:PSS modified ITO in succession. The thickness (around 90 nm) of film was controlled the spin-coating speed at 1500-2000 r.m.p. Subsequently, the active layer was annealed at 100 °C for 10 min.

**Table S2.** The best photovoltaic parameters of P3TE-C8:ITIC with different DIO ratios.

| DIO ratio | $V_{OC}$ (V) | $J_{SC}$ (mA cm <sup>-2</sup> ) | $FF$ (%) | $PCE$ (%) |
|-----------|--------------|---------------------------------|----------|-----------|
| 0         | 0.797        | 12.70                           | 45.29    | 4.58      |
| 0.5%      | 0.814        | 12.80                           | 52.48    | 5.47      |
| 1%        | 0.809        | 12.24                           | 44.57    | 4.42      |
| 2%        | 0.815        | 9.96                            | 39.44    | 3.20      |

P3TE-C8:ITIC (1.5:1 w/w) were dissolved in chlorobenzene solution with a concentration of 10 mg mL<sup>-1</sup>. The solution was heated to 40 °C until total dissolution. The DIO was added into above solution. After 30 min, the resulting solution was spin-coated onto PEDOT:PSS modified ITO in succession. The thickness (around 90 nm) of film was controlled the spin-coating speed at 1500 r.m.p. Subsequently, the active layer was annealed at 100 °C for 10 min.

**Table S3.** The best photovoltaic parameters of P3TE-C8:ITIC with different annealing temperatures.

| Annealing temperature (°C) | $V_{OC}$ (V) | $J_{SC}$ (mA cm <sup>-2</sup> ) | $FF$ (%) | $PCE$ (%) |
|----------------------------|--------------|---------------------------------|----------|-----------|
| 80                         | 0.827        | 12.13                           | 49.25    | 4.94      |
| 100                        | 0.814        | 12.86                           | 52.48    | 5.47      |
| 120                        | 0.825        | 12.71                           | 50.61    | 5.31      |
| 140                        | 0.828        | 11.59                           | 52.21    | 5.30      |
| 160                        | 0.829        | 11.40                           | 51.78    | 4.89      |

P3TE-C8:ITIC (1.5:1 w/w) were dissolved in chlorobenzene solution with a concentration of 10 mg mL<sup>-1</sup>. The solution was heated to 40 °C until total dissolution. The 0.5% DIO was added into above solution. After 30 min, the resulting solution was spin-coated onto PEDOT:PSS modified ITO in succession. The thickness (around 90 nm) of film was controlled the spin-coating speed at 1500 r.m.p. Subsequently, the active layer was annealed at 80-160 °C for 10 min.

**Table S4.** The best photovoltaic parameters of P3TE-C12:ITIC with different D:A weight ratios (w/w).

| D:A ratio | $V_{OC}$ (V) | $J_{SC}$ (mA cm <sup>-2</sup> ) | $FF$ (%) | $PCE$ (%) |
|-----------|--------------|---------------------------------|----------|-----------|
| 1.5:1     | 0.917        | 10.15                           | 57.54    | 5.36      |
| 1:1       | 0.916        | 12.83                           | 52.06    | 6.12      |
| 1:1.5     | 0.907        | 12.46                           | 49.48    | 5.59      |

P3TE-C12:ITIC was dissolved in chlorobenzene solution with a concentration of 10 mg mL<sup>-1</sup>. The solution was heated to 40 °C until total dissolution. The resulting solution was spin-coated onto PEDOT:PSS modified ITO in succession. The thickness (around 90 nm) of film was controlled the spin-coating speed at 1500-2000 r.m.p. Subsequently, the active layer was annealed at 100 °C for 10 min.

**Table S5.** The best photovoltaic parameters of P3TE-C12:ITIC with different DIO ratios.

| DIO ratio | $V_{OC}$ (V) | $J_{SC}$ (mA cm <sup>-2</sup> ) | $FF$ (%) | $PCE$ (%) |
|-----------|--------------|---------------------------------|----------|-----------|
| 0         | 0.916        | 12.83                           | 52.06    | 6.12      |
| 0.5%      | 0.904        | 13.81                           | 55.96    | 6.99      |
| 1%        | 0.885        | 11.56                           | 42.86    | 4.39      |
| 2%        | 0.888        | 10.14                           | 37.26    | 3.35      |

P3TE-C12:ITIC (1:1 w/w) were dissolved in chlorobenzene solution with a concentration of 10 mg mL<sup>-1</sup>. The solution was heated to 40 °C until total dissolution. The DIO was added into above solution. After 30 min, the resulting solution was spin-coated onto PEDOT:PSS modified ITO in succession. The thickness (around 90 nm) of film was controlled the spin-coating speed at 1700 r.m.p. Subsequently, the active layer was annealed at 100 °C for 10 min.

**Table S6.** The best photovoltaic parameters of P3TE-C12:ITIC with different annealing temperatures.

| Annealing temperature (°C) | $V_{OC}$ (V) | $J_{SC}$ (mA cm <sup>-2</sup> ) | $FF$ (%) | $PCE$ (%) |
|----------------------------|--------------|---------------------------------|----------|-----------|
| 80                         | 0.903        | 14.25                           | 53.99    | 6.95      |
| 100                        | 0.904        | 13.81                           | 55.96    | 6.99      |
| 120                        | 0.909        | 13.50                           | 58.09    | 7.13      |
| 140                        | 0.906        | 14.20                           | 59.36    | 7.64      |
| 160                        | 0.890        | 12.57                           | 60.25    | 6.74      |

P3TE-C12:ITIC (1:1 w/w) were dissolved in chlorobenzene solution with a concentration of 10 mg mL<sup>-1</sup>. The solution was heated to 40 °C until total dissolution. The 0.5% DIO was added into above solution. After 30 min, the resulting solution was spin-coated onto PEDOT:PSS modified ITO in succession. The thickness (around 90 nm) of film was controlled the spin-coating speed at 1700 r.m.p. Subsequently, the active layer was annealed at 80-160 °C for 10 min.

**Table S7.** The detailed energy losses of P3TE-C8:ITIC and P3TE-C12:ITIC-based devices.

|               | $E_{\text{gap}}$ (eV) | $qV_{\text{oc}}$ (eV) | $q\Delta V$ (eV) | $\Delta E_1$ (eV) | $\Delta E_2$ (eV) | $\text{EQE}_{\text{EL}}$ | $\Delta E_3$ (eV) |
|---------------|-----------------------|-----------------------|------------------|-------------------|-------------------|--------------------------|-------------------|
| P3TE-C8:ITIC  | 1.66                  | 0.814                 | 0.846            | 0.276             | 0.207             | 7.97E-7                  | 0.363             |
| P3TE-C12:ITIC | 1.66                  | 0.906                 | 0.754            | 0.276             | 0.141             | 2.18E-6                  | 0.337             |
